# Supplementary material for: TGFBR3L—An Uncharacterised Pituitary Specific Membrane Protein Detected in the Gonadotroph Cells in Non-Neoplastic and Tumour Tissue
Source: PubMed Central journal article supplement (PMC7795056; doi:10.3390/cancers13010114), 2020-12-31

gonadotroph

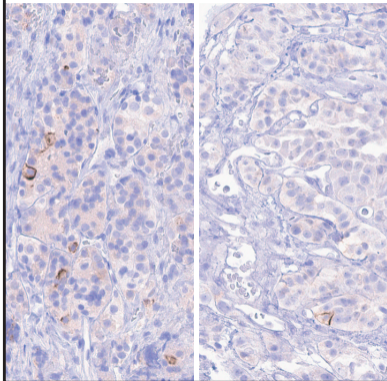

corticotroph

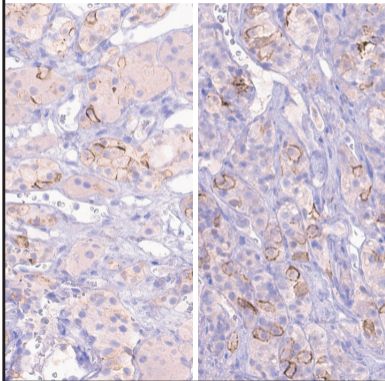

lactotroph

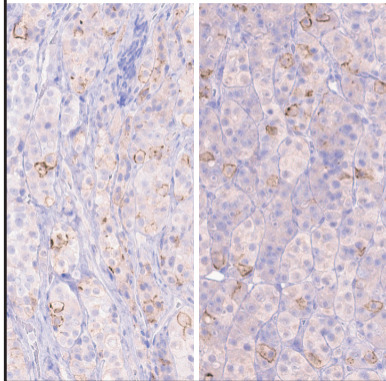

somato-lactotroph

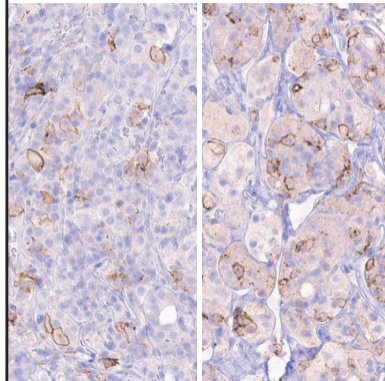

Supplement: cancers-13-00114-s001.pdf [file cancers-13-00114-s001.pdf]
